# Supplementary material for: Pharmacokinetics of Hydroxytyrosol and Its Sulfate and Glucuronide Metabolites after the Oral Administration of Table Olives to Sprague-Dawley Rats
Source: PubMed Central journal article supplement (PMC10835732; doi:10.1021/acs.jafc.3c06431), 2024-01-17
Supplement: jf3c06431_si_001.pdf [file jf3c06431_si_001.pdf]

## SUPPORTING INFORMATION

### Pharmacokinetics of hydroxytyrosol and its sulfate and glucuronide metabolites after the oral administration of table olives to Sprague–Dawley rats

*Ivana Kundisová<sup>1</sup>, Helena Colom<sup>2</sup>, M. Emília Juan<sup>1</sup> and Joana M. Planas<sup>1</sup>*

<sup>1</sup>Grup de Fisiologia i Nutrició Experimental, Departament de Bioquímica i Fisiologia, Facultat de Farmàcia i Ciències de l'Alimentació and Institut de Recerca en Nutrició i Seguretat Alimentària (INSA-UB, Maria de Maeztu Unit of Excellence), Universitat de Barcelona (UB), and Food Innovation Network (XIA). Av. Joan XXIII 27-31, 08028-Barcelona, Spain.

<sup>2</sup>Grup de Farmacocinètica, Farmacodinàmia i Farmacogenòmica poblacional, Departament de Farmàcia i Tecnologia Farmacèutica, i Físicoquímica, Facultat de Farmàcia i Ciències de l'Alimentació, Universitat de Barcelona (UB). Av. Joan XXIII 27-31, 08028-Barcelona, Spain.

#### Supplementary Material

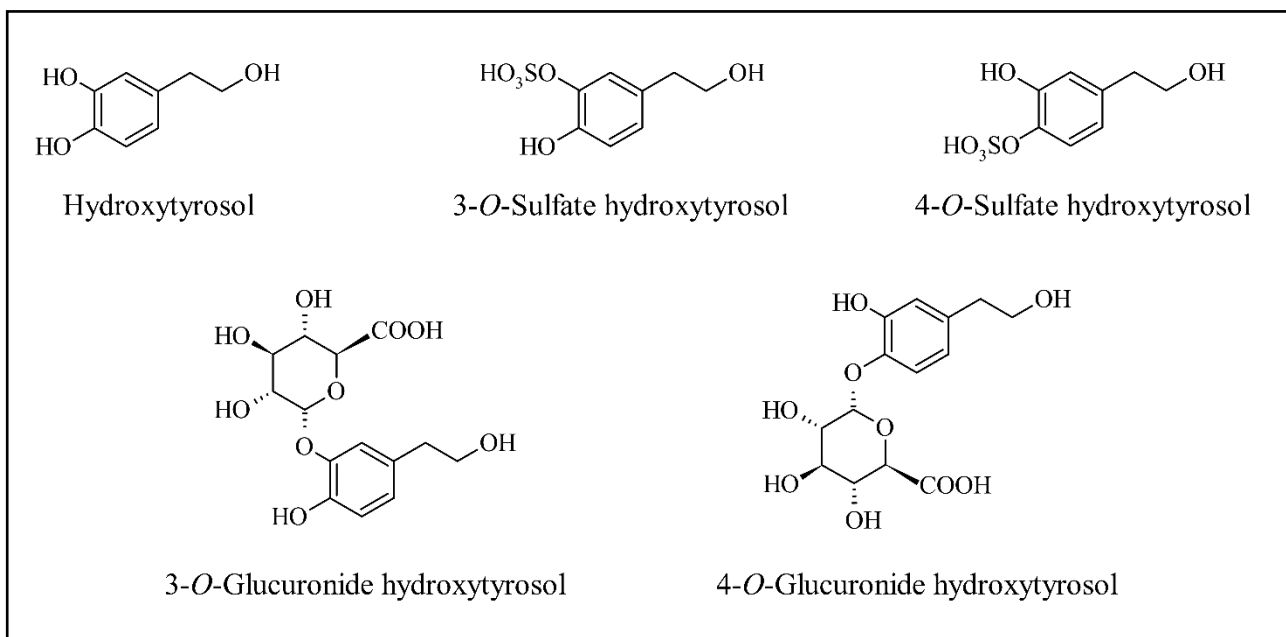

**Figure S1.** Chemical structures of hydroxytyrosol and its sulfate and glucuronide conjugates.
